# Supplementary material for: Retention of hexanucleotide repeat-containing intron in C9orf72 mRNA: implications for the pathogenesis of ALS/FTD
Source: Springer Nature journal article supplement (doi:10.1186/s40478-016-0289-4), 2016-02-25
Supplement: MOESM1 [file 25665896]

## SUPPLEMENTARY MATERIAL

|                      | Expanded cases (n = 12) | Controls (n = 10) |
|----------------------|-------------------------|-------------------|
| Gender (male)        | 6 (50%)                 | 3 (30%)           |
| Age at death (years) | 59 (39 - 71)            | 81.3 (38 - 90)    |
| RIN frontal cortex   | 4.9 (3.8 - 5.7)         | 4.6 (3.9 - 6.5)   |
| Diagnosis            |                         |                   |
| FTLD                 | 1 (8%)                  | -                 |
| FTLD/MND             | 3 (25%)                 | -                 |
| MND                  | 8 (66%)                 | -                 |

**Supplementary Table 1** Demographic, clinical and biochemical data of brain samples used for qRT-PCR analysis. FTLN, frontotemporal lobar degeneration; FTLN-MND, frontotemporal lobar degeneration with motor neuron disease.

| SEQUENCE                       | LOCATION        | NAME                                    | INITIAL SEPARATION | CYCLE NO. | DENATURATION | ANNEALING   | EXTENTION   | FINAL EXTENTION |
|--------------------------------|-----------------|-----------------------------------------|--------------------|-----------|--------------|-------------|-------------|-----------------|
| For GGTGCGTCAAAACAGCGACAAGTTC  | Exon 1a         | <i>C9orf72</i><br>5' primer pair        | 5 min, 95°C        | 36        | 1 min, 95°C  | 40 s, 61°C  | 30 s, 72°C  | 10 min, 72°C    |
| Rev GCTACAGGCTGCGGTTGTTCC      | Intron 1        |                                         |                    |           |              |             |             |                 |
| For GGACACAATTCAACCCACAAGTG    | Intron 1        | <i>C9orf72</i><br>3' primer pair        | 5 min, 95°C        | 37        | 1 min, 95°C  | 40 s, 64°C  | 1 min, 72°C | 10 min, 72°C    |
| Rev GCCTTCATGACAGCTGTCACC      | Exon 5          |                                         |                    |           |              |             |             |                 |
| For GCAAGAGCAGGTGTGGGTTTAGG    | Exon 1a         | <i>C9orf72</i> intron 1 splicing<br>out | 5 min, 95°C        | 35        | 1 min, 95°C  | 50 s, 60°C  | 50 s, 72°C  | 10 min, 72°C    |
| Rev CATCTATAGCACTCTCTGC        | Exon 2          |                                         |                    |           |              |             |             |                 |
| For GCAAGAGCAGGTGTGGGTTTAGG    | Exon 1a         | <i>C9orf72</i> repeats<br>spanning      | 5 min, 95°C        | 40        | 1 min, 95°C  | 1 min, 59°C | 40 s, 72°C  | 10 min, 72°C    |
| Rev AGTCGCTAGAGGCGAAAAGC       | Intron 1        |                                         |                    |           |              |             |             |                 |
| For GCACCTACTGTGCTAGTTGAATGTC  | Intron 1        | <i>C9orf72</i> exon 2 SNP<br>detection  | 5 min, 95°C        | 35        | 1 min, 95°C  | 1 min, 55°C | 1 min, 72°C | 10 min, 72°C    |
| Rev CATCTATAGCACTCTCTGC        | Exon 2          |                                         |                    |           |              |             |             |                 |
| For GCAGAGAGTGGTGCTATAGATG     | Exon 2          | Total <i>C9orf72</i>                    | 5 min, 95°C        | 25        | 1 min, 95°C  | 30 s, 60°C  | 40 s, 72°C  | 10 min, 72°C    |
| Rev GCCTTCATGACAGCTGTCACC      | Exon 5          |                                         |                    |           |              |             |             |                 |
| For GTGGACCTGACCTGCCGTCTAG     | Exon 7          | <i>GAPDH</i>                            | 5 min, 95°C        | 25        | 1 min, 95°C  | 30 s, 61°C  | 20 s, 72°C  | 10 min, 72°C    |
| Rev CCTGTTGCTGTAGCCAAATTCGTTG  | Exon 8          |                                         |                    |           |              |             |             |                 |
| For CCTGGTCTTGTGGAAGTGAAGTTC   | NEAT1<br>lncRNA | <i>NEAT1</i>                            | 5 min, 95°C        | 28        | 1 min, 95°C  | 30 s, 59°C  | 30 s, 72°C  | 10 min, 72°C    |
| Rev TAAAGCGTTGGTCAATGTTGTCC    |                 |                                         |                    |           |              |             |             |                 |
| For CTACCCCTGGATGCGCAAAG       | Exon 2          | <i>HOX4B</i>                            | 5 min, 95°C        | 35        | 1 min, 95°C  | 50 s, 61°C  | 1 min, 72°C | 10 min, 72°C    |
| Rev CGAGCGGATCTGGTGTGG         | Exon 3          |                                         |                    |           |              |             |             |                 |
| <b>Conditions for qRT-PCR</b>  |                 |                                         |                    |           |              |             |             |                 |
| For GCAAGAGCAGGTGTGGGTTTAG     | Exon 1a         | <i>C9orf72</i><br>5' primer pair        | 10 min, 95°C       | N/A       | 30 s, 95°C   | 25 s, 61°C  | 25 s, 72°C  | N/A             |
| Rev CCTCAGCGAGTACTGTGAGAGC     | Intron 1        |                                         |                    |           |              |             |             |                 |
| For CCTGATAGGAGATAACAGGATTCCAC | Intron 1        | <i>C9orf72</i><br>3' primer pair        | 10 min, 95°C       | N/A       | 30 s, 95°C   | 25 s, 61°C  | 25 s, 72°C  | N/A             |
| Rev CGACATCACTGCATTCCAATGTC    | Exon 2          |                                         |                    |           |              |             |             |                 |
| For GCAAGAGCAGGTGTGGGTTTAG     | Exon 1a         | <i>C9orf72</i> intron 1 splicing<br>out | 10 min, 95°C       | N/A       | 30 s, 95°C   | 25 s, 61°C  | 25 s, 72°C  | N/A             |
| Rev CGACATCACTGCATTCCAATGTC    | Exon 2          |                                         |                    |           |              |             |             |                 |

**Supplementary Table 2** Primer sequences and PCR conditions.

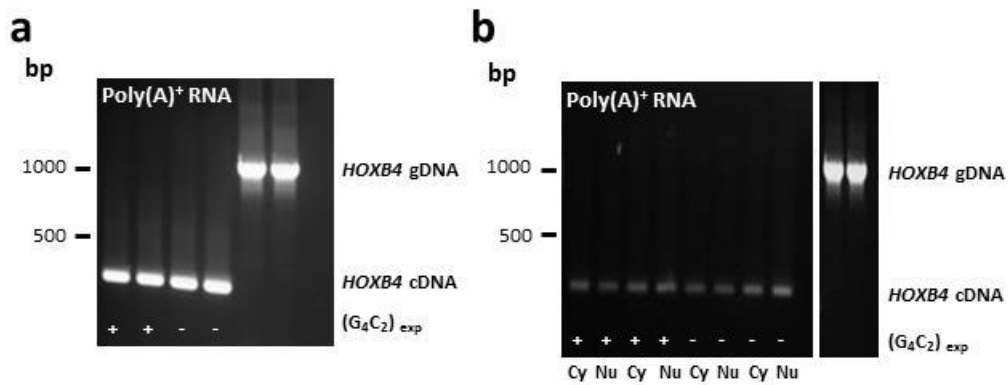

**Supplementary Fig. 1 a** PCR analysis of *HOXB4* confirming the absence of genomic DNA (gDNA) contamination in cDNA reversed transcribed from poly(A)<sup>+</sup> RNA purified from lymphoblasts. PCR was performed using primers flanking an 842 bp intron of the *HOXB4* gene. A single 268 bp product, containing exonic sequences but lacking the intron was detected in cDNA samples from lymphoblasts whereas an 1110 bp product, containing exonic sequences and the intron was detected in control gDNA. **b** Absence of contaminating genomic DNA in cytoplasmic and nuclear fractions. PCR analysis of *HOXB4* confirming the absence of genomic DNA contamination in cDNA reversed transcribed from poly(A)<sup>+</sup> RNA purified from nuclear and cytoplasmic fractions from expansion carrier and control lymphoblasts. PCR analysis was performed as described for Fig. 1.

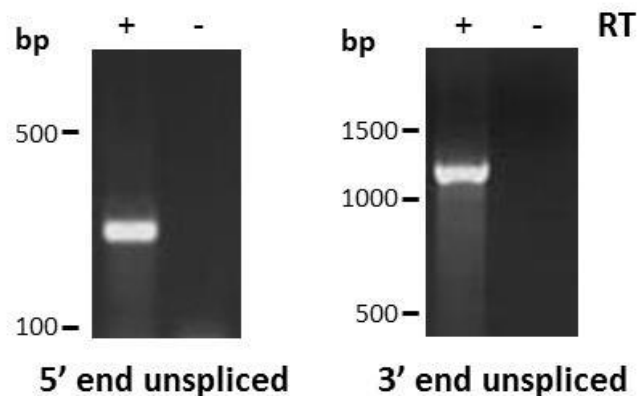

**Supplementary Fig. 2** RT-PCR analysis of poly(A)<sup>+</sup> RNA isolated from lymphoblasts using the 5' primer pair or the 3' primer pair as in Fig. 1, with or without reverse transcriptase.

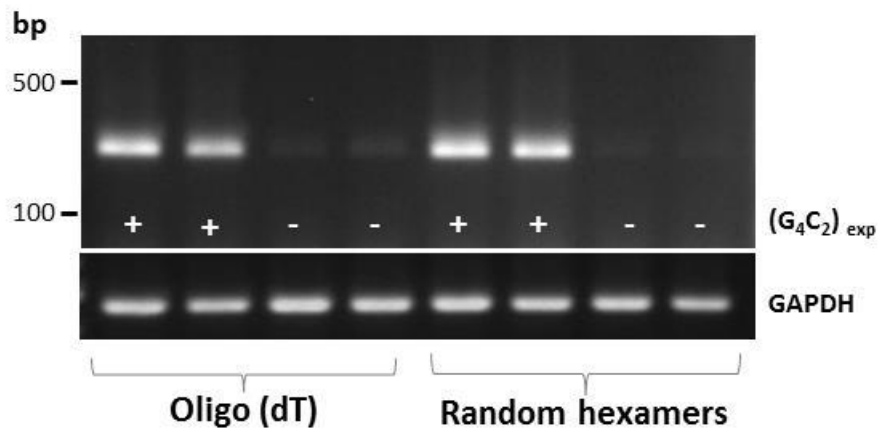

**Supplementary Fig. 3** Comparison of reverse transcription priming with oligo(dT) and random hexamers. PCR was performed with the 5' primer pair, as described for Fig. 1.

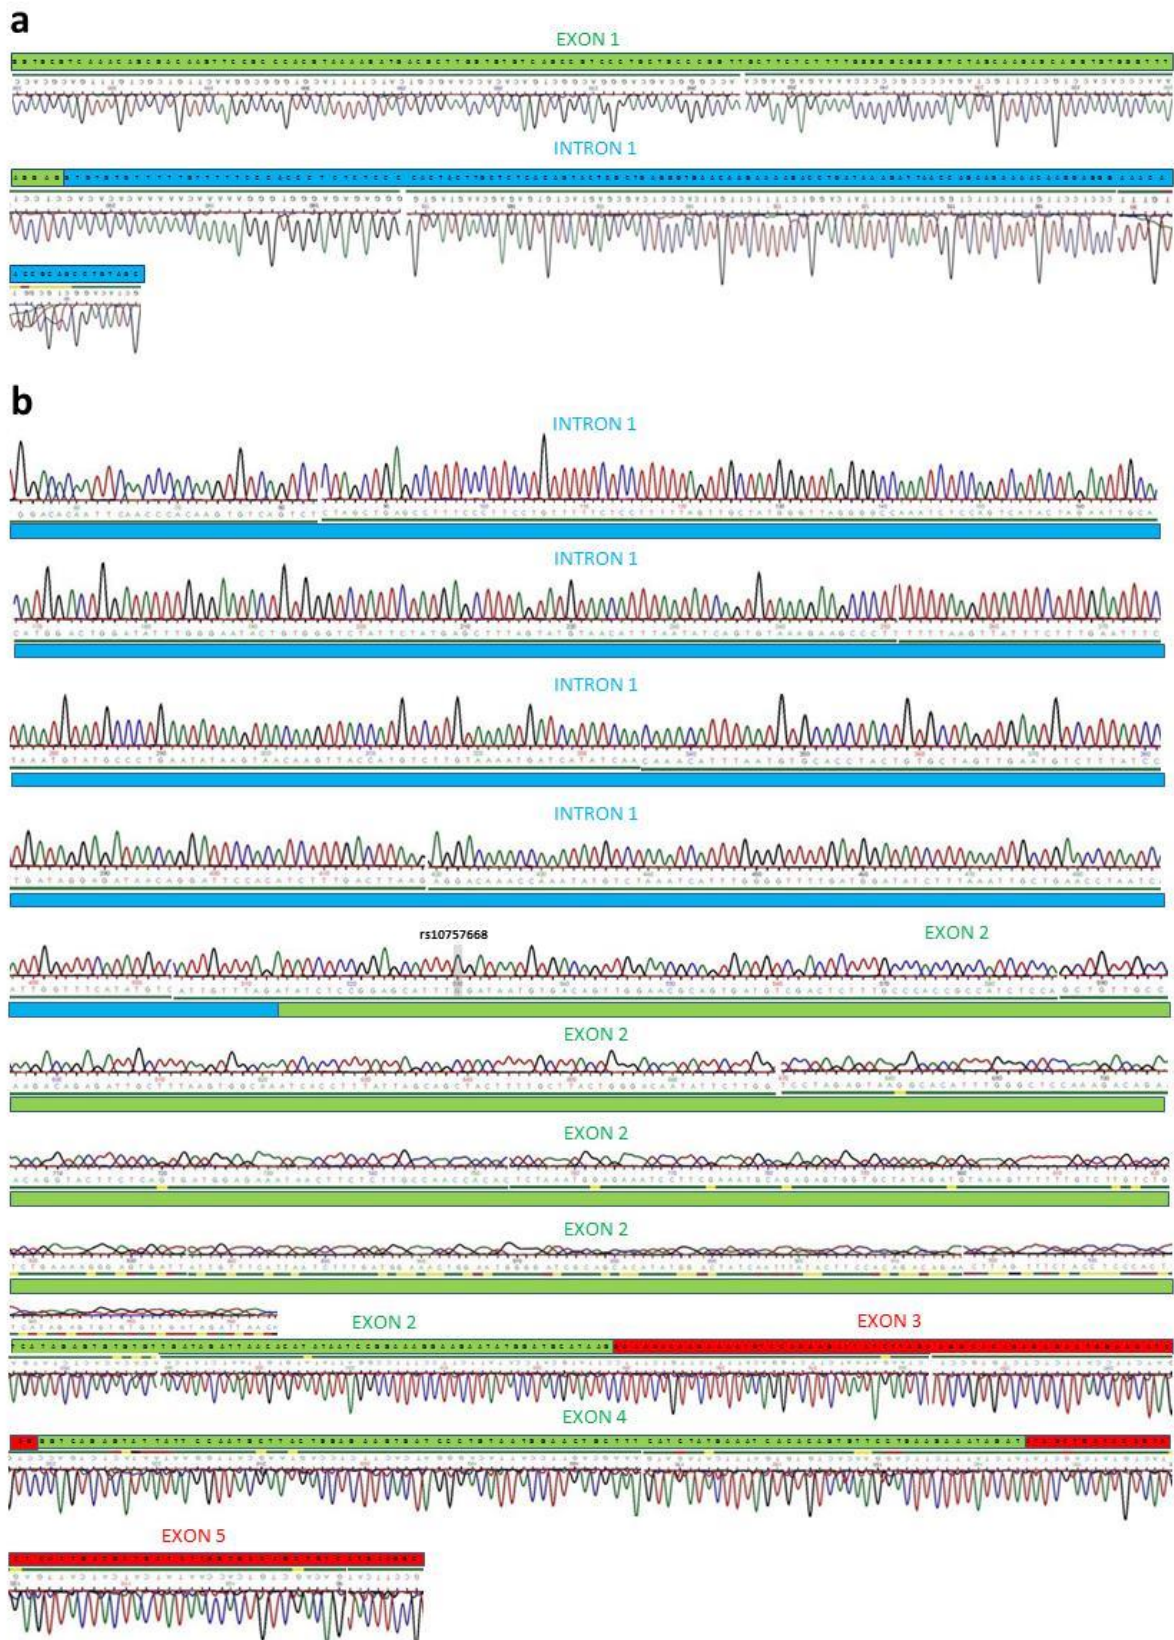

**Supplementary Fig. 4** Sequence of intron 1-retaining *C9orf72* transcripts. **a** Chromatogram of the sequence of the PCR product obtained with the 5' primer pair showing the exon 1a-intron 1 boundary. The sequence of the reverse strand is shown. **b** Chromatogram of the sequence of the PCR product obtained with the 3' primer pair showing the intron 1-exon 2 boundary and exon 2-3, 3-4 and 4-5 junctions. The sequence of the reverse strand is shown for the 3' end of the product.

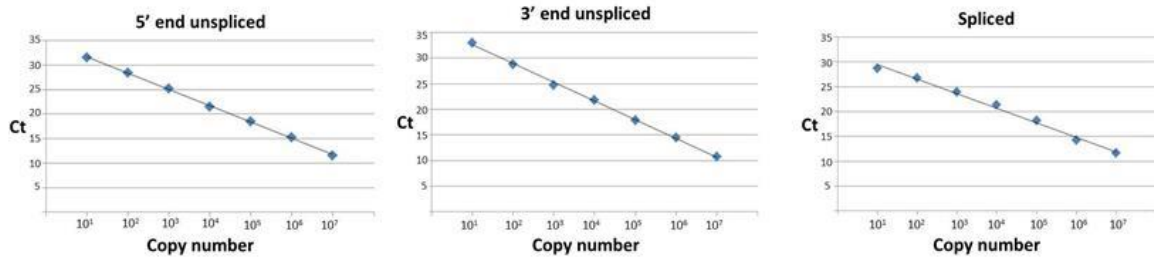

**Supplementary Fig. 5** qPCR standard curves for the determination of levels of *C9orf72* transcripts unspliced at the 5' end or 3' end of intron 1, or spliced transcripts.
